# Supplementary material for: Anti-Nipah: A QSAR Based Prediction Method to Identify the Inhibitors Against Nipah Virus
Source: Preprints.org preprint supplement (doi:10.20944/preprints201810.0103.v1), 2018-10-05
Supplement: Supplementary file 1 [file supplementary]

## anti-Nipah: A QSAR based prediction method to identify the inhibitors against Nipah virus

Akanksha Rajput<sup>#</sup>, Archit Kumar<sup>#</sup> and Manoj Kumar \*

Virology Discovery Unit and Bioinformatics Centre, Institute of Microbial Technology, Council of Scientific and Industrial Research (CSIR), Sector 39A, Chandigarh-160036, India.

<sup>#</sup> Equal contributions

\* Corresponding Author: [manojk@imtech.res.in](mailto:manojk@imtech.res.in)

**Supplementary Figure S1.** Frequency distribution of assays used to check the inhibition of anti-Nipah compounds

**Supplementary Figure S2.** The principal component of the antiviral and non-antiviral compounds or drugs against NiV. The red spheres (left) represent active compounds and green spheres (right) represent non-active compounds against NiV

**Supplementary Table S1.** Details of the most relevant descriptors extracted from mRMR feature selection algorithm and used for prediction model development

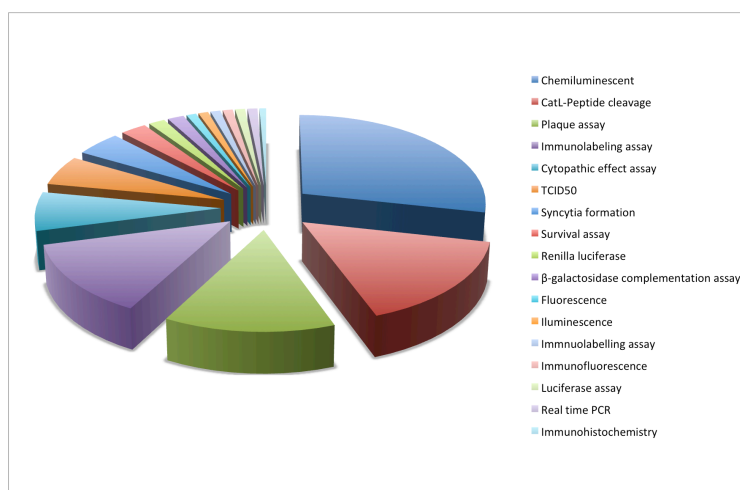

**Supplementary Figure S1.** Frequency distribution of assays used to check the inhibition of anti-Nipah compounds

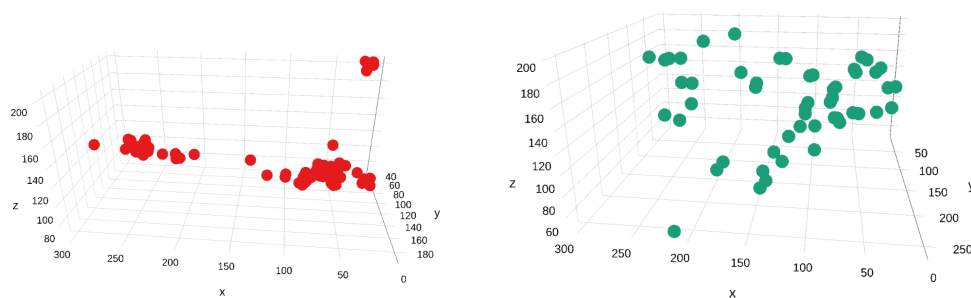

**Supplementary Figure S2.** The principal component of the antiviral and non-antiviral compounds or drugs against NiV. The red spheres (left) represent active compounds and green spheres (right) represent non-active compounds against NiV.

**Supplementary Table S1.** Details of the most relevant descriptors extracted from mRMR feature selection algorithm and used for prediction model development

| Descriptor Name | Type                                                                                                                | Description                                                                           |
|-----------------|---------------------------------------------------------------------------------------------------------------------|---------------------------------------------------------------------------------------|
| FP502           | CDK fingerprint                                                                                                     | Fingerprint of length 1024 and search depth of 8                                      |
| FP169           | CDK fingerprint                                                                                                     | Fingerprint of length 1024 and search depth of 8                                      |
| KRFP4293        | Klekota-Roth fingerprint                                                                                            | Presence of chemical substructures                                                    |
| FP265           | CDK fingerprint                                                                                                     | Fingerprint of length 1024 and search depth of 8                                      |
| FP644           | CDK fingerprint                                                                                                     | Fingerprint of length 1024 and search depth of 8                                      |
| GATS5e          | CDK graph only fingerprint                                                                                          | Specialized version of the Fingerprinter which does not take bond orders into account |
| GraphFP87       | CDK graph only fingerprint<br>Specialized version of the Fingerprinter which does not take bond orders into account | Specialized version of the Fingerprinter which does not take bond orders into account |
| FP731           | CDK fingerprint                                                                                                     | Fingerprint of length 1024 and search depth of 8                                      |
| nsssN           | 2D                                                                                                                  | Atom type electrotopological state                                                    |
| ExtFP308        | CDK extended fingerprint                                                                                            | Extends the Fingerprinter with additional bits describing ring features               |
| FP490           | CDK fingerprint                                                                                                     | Fingerprint of length 1024 and search depth of 8                                      |
| ExtFP857        | CDK extended fingerprint                                                                                            | Extends the Fingerprinter with additional bits describing ring features               |
| FP626           | CDK fingerprint                                                                                                     | Fingerprint of length 1024 and search depth of 8                                      |
| GraphFP101      | CDK graph only fingerprint<br>Specialized version of the Fingerprinter which does not take bond orders into account | Specialized version of the Fingerprinter which does not take bond orders into account |

|              |                                                                                                                     |                                                                                       |
|--------------|---------------------------------------------------------------------------------------------------------------------|---------------------------------------------------------------------------------------|
| FP541        | CDK fingerprint                                                                                                     | Fingerprint of length 1024 and search depth of 8                                      |
| PubchemFP824 | Pubchem fingerprint                                                                                                 | Pubchem fingerprint                                                                   |
| FP551        | CDK fingerprint                                                                                                     | Fingerprint of length 1024 and search depth of 8                                      |
| GraphFP980   | CDK graph only fingerprint<br>Specialized version of the Fingerprinter which does not take bond orders into account | Specialized version of the Fingerprinter which does not take bond orders into account |
| ExtFP666     | CDK extended fingerprint                                                                                            | Extends the Fingerprinter with additional bits describing ring features               |
| FP172        | CDK fingerprint                                                                                                     | Fingerprint of length 1024 and search depth of 8                                      |
